# Supplementary material
Source: publisher figshare collection journal article supplement (https://frontiersin.figshare.com/ndownloader/files/22116870)
Supplement: Supplementary file 1 [file 22116870]

## *Supplemental Material*

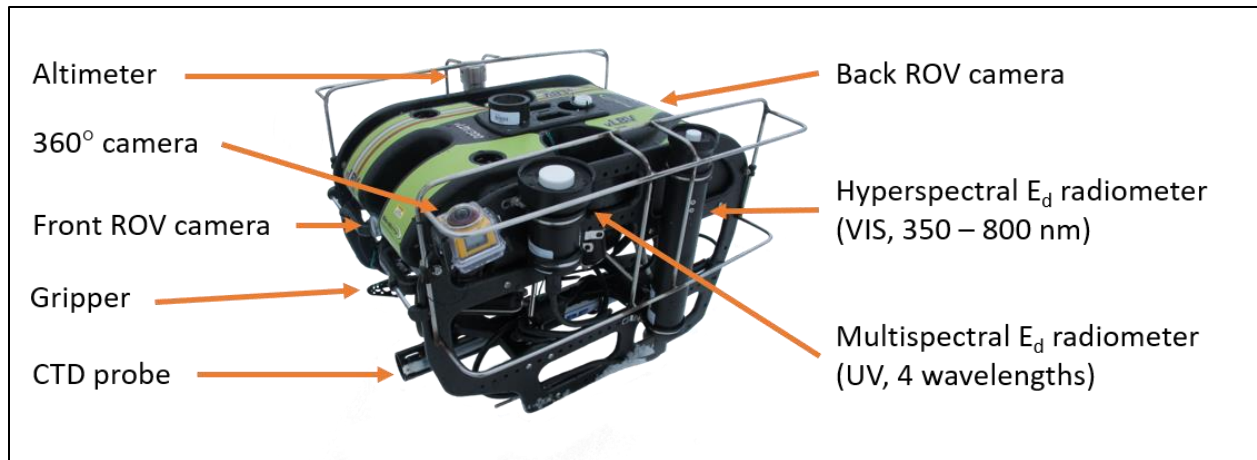

**Supplementary Figure S1.** Photograph of ROV equipped with sensors, cameras and a gripper for under-ice measurements.

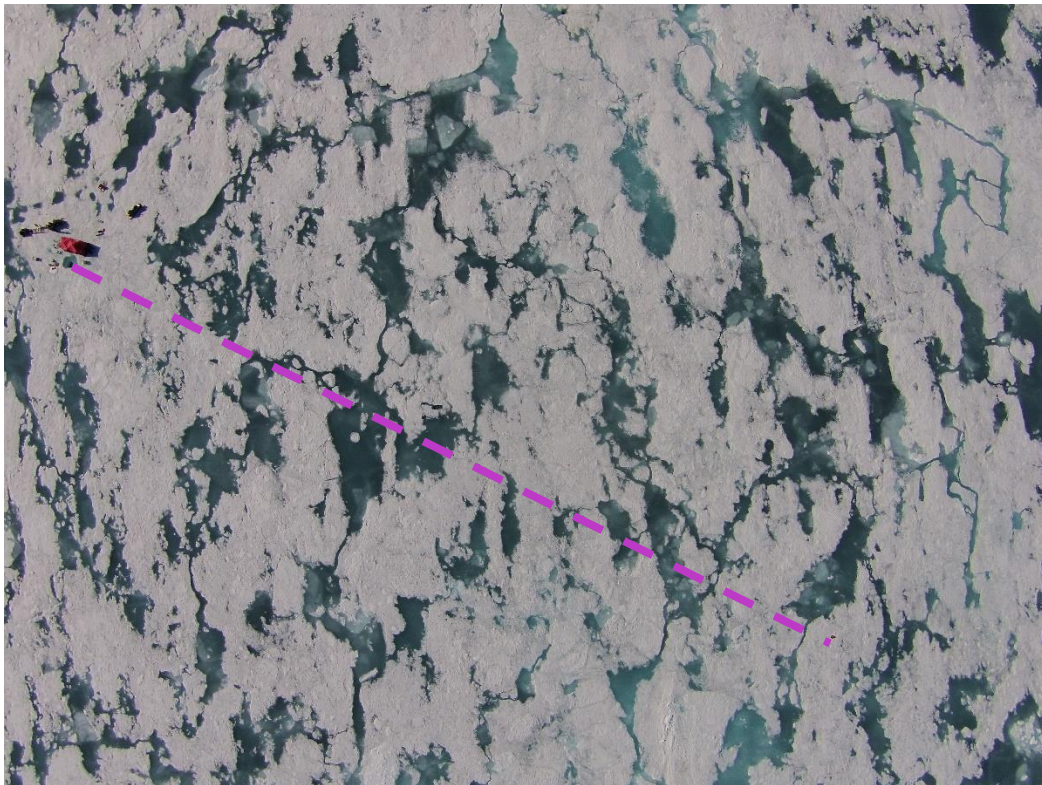

**Supplementary Figure S2.** Areal drone image of sampling area taken at 90 m height on 30 June 2016. The surveyed D transect is shown as orange line.

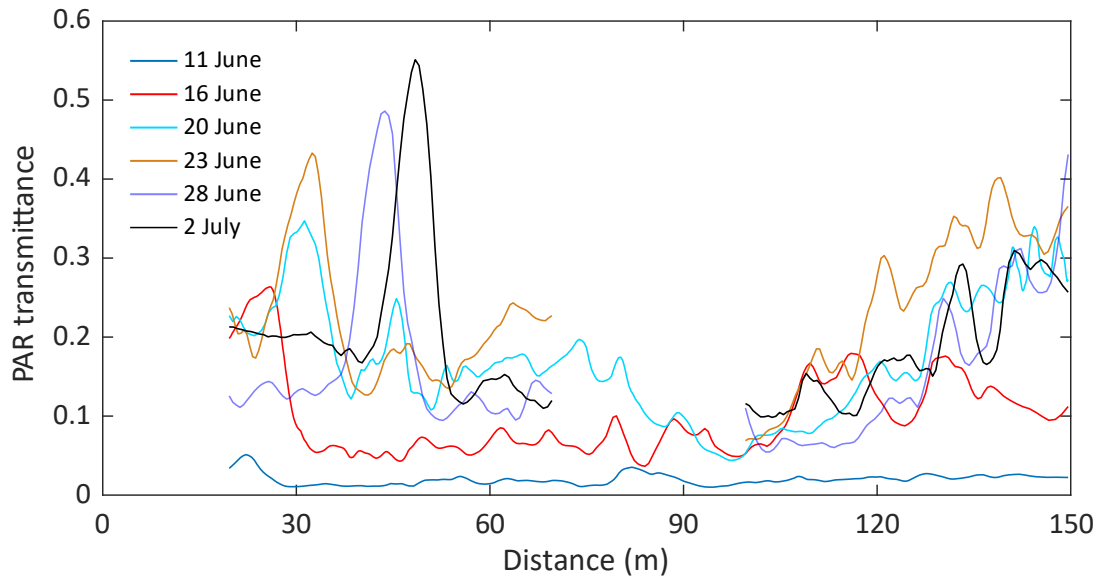

**Supplementary Figure S3.** PAR transmittance calculated along the ND transect for five days over the sampling period.

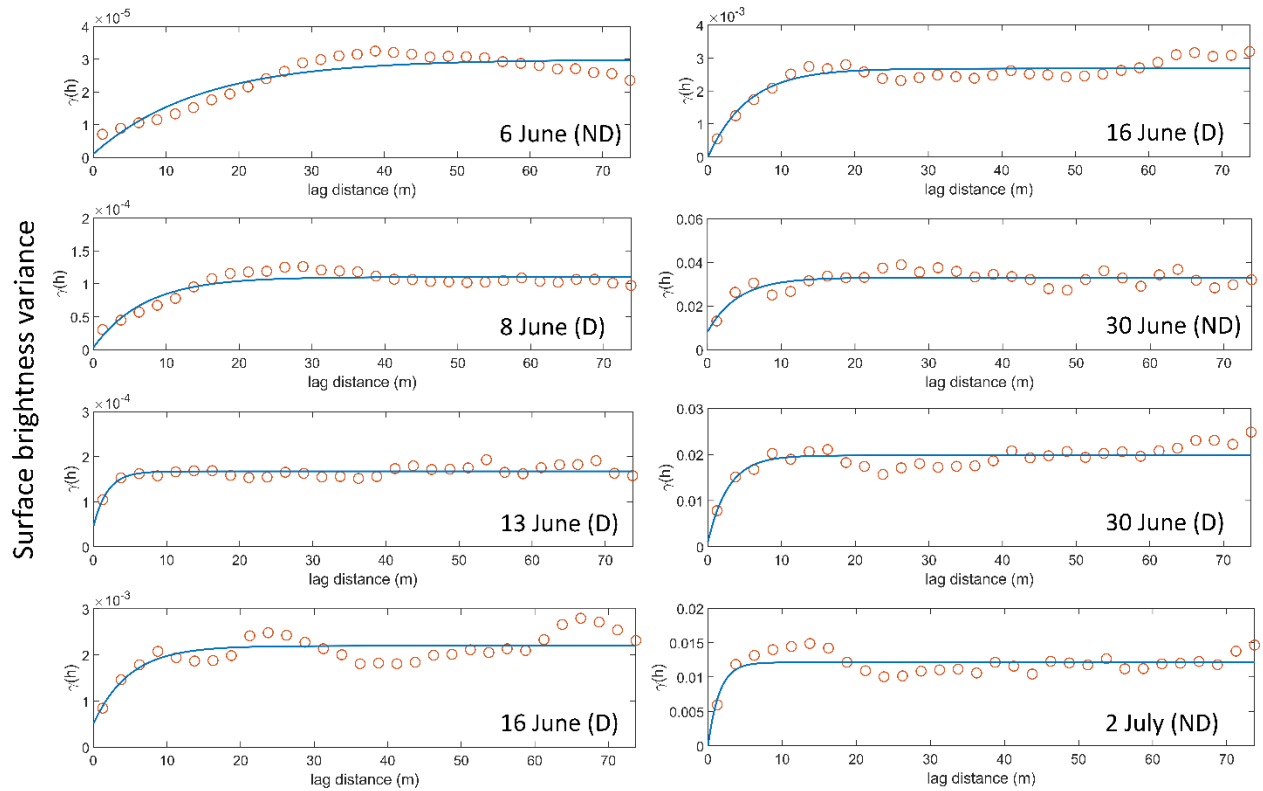

**Supplementary Figure S4.** Variograms of surface brightness obtained from horizontal transects. Empirical variograms are shown as orange dots and fitted theoretical exponential variograms are shown as black lines.

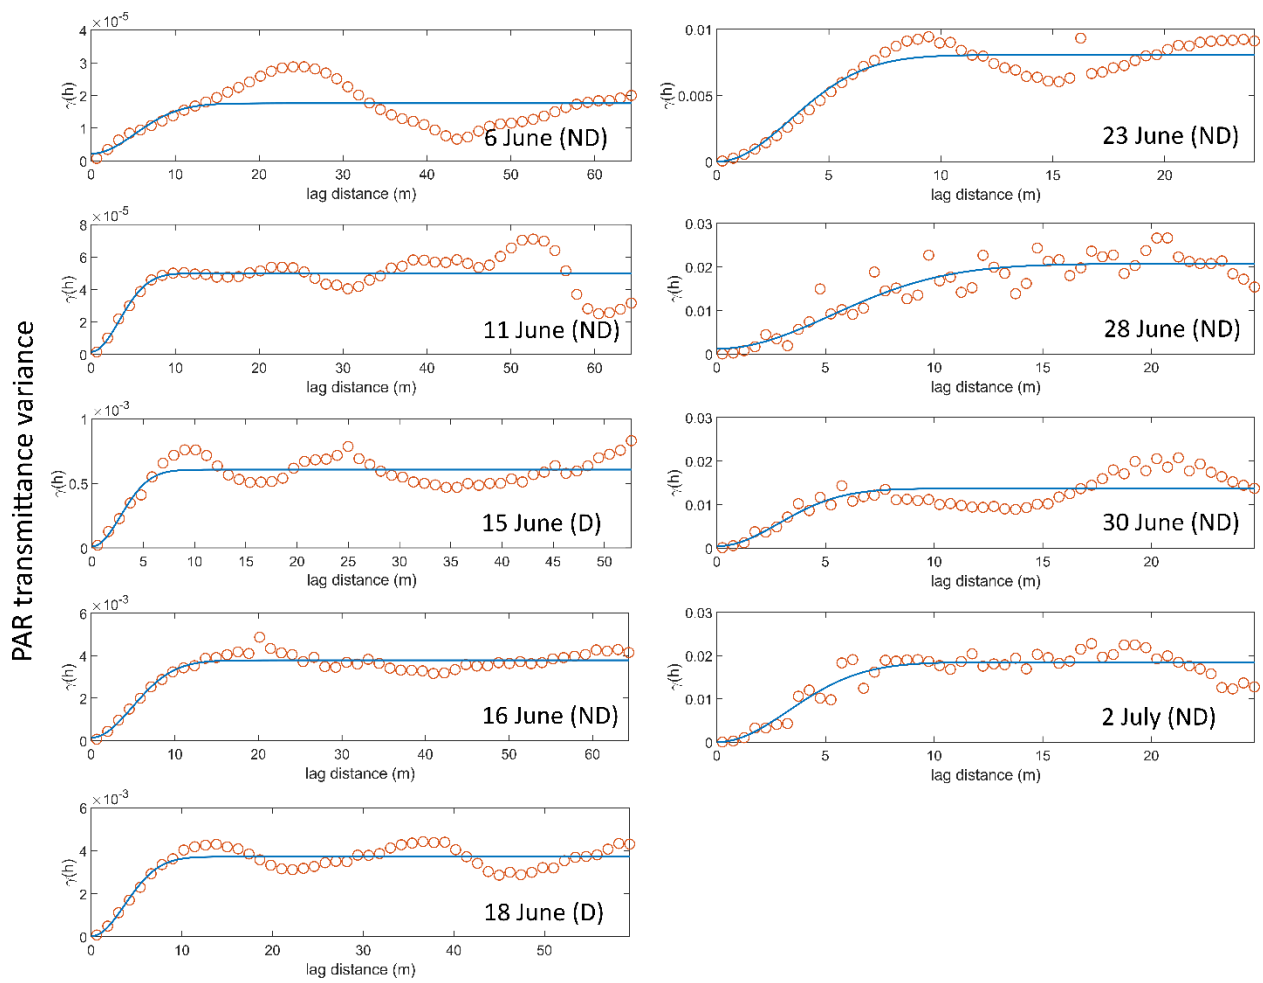

**Supplementary Figure S5.** Variograms of PAR transmittance obtained from horizontal transects. Empirical variograms are shown as orange dots and fitted theoretical gaussian variograms are shown as black lines.

**Supplementary Table T1.** Computed mean variogram range (m) of surface reflectance and PAR transmittance of the observed melt stages (I - III).

| Variogram range (m) |                    |                   |
|---------------------|--------------------|-------------------|
|                     | Surface brightness | PAR transmittance |
| Stage I             | 4.4                | 6.0               |
|                     | n = 2              | n = 2             |
| Stage II            | 5.1                | 5.3               |
|                     | n = 2              | n = 3             |
| Stage III           | 2.8                | 5.2               |
|                     | n = 3              | n = 4             |

**Supplementary Video V1.** Video of ice bottom recorded at 2 m with a 360 degree action camera along horizontal D transect on 13 June.
